# Supplementary material for: Introducing an efficient sampling method for national surveys with limited sample sizes: application to a national study to determine quality and cost of healthcare
Source: Springer Nature journal article supplement (doi:10.1186/s12889-021-11441-0), 2021-07-17
Supplement: MOESM2 [file 19369730]

## # Required Libraries

---

```
#
remove.packages(c("clValid","maptools","rgeos","rgdal","spdep","mclust
"))
# packageUrl<- "https://cran.r-project.org/src/contrib/Archive/
devtools/devtools_1.12.0.tar.gz"
# install.packages(packageUrl, repos=NULL, type='source')
# library("devtools")
# install_version("clValid", version = "0.6-4", repos = "http://
cran.us.r-project.org")
# install_version("maptools", version = "0.8-40", repos = "http://
cran.us.r-project.org")
# packageUrl<- "https://cran.r-project.org/src/contrib/Archive/rgeos/
rgeos_0.3-15.tar.gz"
# install.packages(packageUrl, repos=NULL, type='source')
# install.packages("rgeos")
# install.packages("rgdal")
# install_version("spdep", version = "0.6-8", repos = "http://
cran.us.r-project.org")
# install_version("mclust", version = "5.2", repos = "http://
cran.us.r-project.org")
# install_version("RColorBrewer", version = "1.0-5", repos = "http://
cran.us.r-project.org")
# install_version("car", version = "2.1-2", repos = "http://cran.us.r-
project.org")
libs <-
c("rpart","rpart.plot","clValid","readstata13","foreign","mclust",
"maptools", "rgeos",
      "rgdal","spdep", "car", "RColorBrewer", "factoextra",
"NbClust", "clustertend", "fpc",
      "randomForest", "caret", "tidyverse", "gdata")
lapply(libs, require, character.only = TRUE)
```

## # Input data

---

```
rm(list=ls())
setwd("C:/Users/MP/Desktop/_IQCAMP Sampling Article/Statistical
Analysis/Data")
PCA.data <- read.dta13("Input Data.dta")
shape31<-readShapePoly("Shape 31/omega.shp",IDvar ="SP_ID")
shape397<-readShapePoly("Final 397 shape/shape397.shp",IDvar ="SP_ID")
w.data <- read.dta("Population Data.dta")
colnames(PCA.data[,c(26,9,10,19,24)])
PCA.data<-PCA.data[,-c(26,9,10,19,24)]
### Missing values
PCA.data[is.na(PCA.data$SBP),"SBP"] = median(PCA.data$SBP, na.rm =
TRUE)
PCA.data[is.na(PCA.data$Cholesterol),"Cholesterol"] =
median(PCA.data$Cholesterol, na.rm = TRUE)
```

```
PCA.data[is.na(PCA.data$Glucose),"Glucose"] = median(PCA.data$Glucose,
na.rm = TRUE)
```

```
# Remove Outlier Data
```

```
-----
x <- PCA.data[,-c(1:4)]
x<- as.matrix(x)
# boxplot(x)
removeOutliers <- function(x,...){
  qnt <- quantile(x, probs = c(0.25,0.75) , na.rm =T)
  H <- 1.5*(qnt[2]-qnt[1])
  y <- x
  y[x < qnt[1]-H] <- qnt[1]-H
  y[y > qnt[2]+H] <- qnt[2]+H
  x <- y
}
newX <- apply(x,2,removeOutliers)
maxs <- apply(newX,2,max)
mins <- apply(newX,2,min)
newX <- as.data.frame(newX)
rownames(newX)<- rownames(PCA.data)
PCA.data[,-c(1:4)]<- scale(newX,scale = maxs-mins, center = mins)
```

```
# Assessment of Clustering Tendency
```

```
-----
res <- get_clust_tendency(PCA.data[,-c(1:4)], n =
nrow(PCA.data)-1, graph = FALSE)
res$hopkins_stat
pdf(paste0(getwd(),"/Get Cluster Tendency.pdf"), width=6,
height=6)
get_clust_tendency(PCA.data[,-c(1:4)], n = nrow(PCA.data)-1,
gradient = list(low = "steelblue", high =
"white"))
dev.off()
```

```
# Optimum Number of Clusters
```

```
-----
### All 30 indecs
nb <- NbClust(PCA.data[,-c(1:4)], distance = "euclidean",
min.nc = 2, max.nc = 15,
method = "complete", index ="all")
pdf(paste0(getwd(),"/Optimal number of clusters.pdf"),
width=8, height=6)
factoextra::fviz_nbclust(nb) + theme_minimal()
dev.off()
```

```
# Rum Model-Based Clustering Method (MCM)
```

```
-----
(MB.cluster <- Mclust(PCA.data[,-c(1:4)]))
summary(MB.cluster)
```

```

cl.MB<-as.vector(MB.cluster$classification)
plot(MB.cluster, PCA.data[,-c(1:2)], what = "BIC")

# Hierarchical Clustering Method (HCM)
-----
H.cluster <- hclust(dist(PCA.data[,-c(1:4)]), "complete")
# plot(H.cluster)
cl.H.2<-as.vector(cutree(H.cluster, 2))
cl.H.8<-as.vector(cutree(H.cluster, 8))
IQCAMP.data<-cbind(PCA.data,cl.MB,cl.H.2,cl.H.8)

# Compare Clustering Algorithm: Internal Validity
-----
### Internal Validity
sapply(list(mb = MB.cluster$classification, hc2 =cl.H.2, hc8
=cl.H.8),
      function(c) cluster.stats(dist(PCA.data[,-c(1:4)]), c)
[c("within.cluster.ss","avg.silwidth", "dunn")])

### External Validity
clmethods <- c("hierarchical","model")
stab <- clValid(PCA.data[,-c(1:4)], nClust = 2:31, clMethods =
clmethods,
              validation = "stability")
# Display only optimal Scores
optimalScores(stab)
summary(stab)
# plot(stab)

#####
#####
#####
####
#####          Identification of Distinct Features of Clusters
#####
####
#####
#####
#####
newX$cl.MB<-cl.MB
dtm<-
rpart(cl.MB~Inpatient+Outpatient+Inpatient51+Outpatient51+patientexcha
ngerate+

Complementary_insurance+Bed_density+SBP+Glucose+Cholesterol+pod_stroke
+

pod_copd+pod_ckd+pod_diabetes+Neonatal_mortality+Adverse_effect+
Mortality_ratio+mortalityhospital,data=newX, method="class")

```

```

varImp(dtm)
rfm<-
randomForest(cl.MB~Inpatient+Outpatient+Inpatient51+Outpatient51+patientexchangerate+
Complementary_insurance+Bed_density+SBP+Glucose+Cholesterol+pod_stroke
+
pod_copd+pod_ckd+pod_diabetes+Neonatal_mortality+Adverse_effect+
Mortality_ratio+mortalityhospital,data=newX )

importance(rfm)
varImpPlot(rfm)

pdf(paste0("DT graph.pdf"), height=4, width=8)
rpart.plot(dtm,box.palette = 0, type=3, extra=2)
dev.off()
p<-predict(dtm, newX, type="class")
table(IQCAMP.data$cl.MB, p)
mean(IQCAMP.data$cl.MB==p)

#####
#####
#####
####
#####          Sampling Efficiency for pod_stroke
#####
####
#####
#####
#####
newX$province<-PCA.data$province
newX$district<-PCA.data$district
newXweight<- merge(newX, w.data ,by=c("district","province"))
var.names<-c("Inpatient", "Outpatient", "Inpatient51", "Outpatient51",
"patientexchangerate",
"SBP", "Glucose","Cholesterol",
"Complementary_insurance", "Bed_density",
"pod_stroke", "pod_copd", "pod_diabetes", "pod_ckd",
"Neonatal_mortality",
"Adverse_effect", "Mortality_ratio","mortalityhospital",
"pop")
set.seed(12345); niter=1000; nclust=8
sim.srs <-matrix(NA, nrow = niter, ncol = length(var.names)-1)
sim.clust<-matrix(NA, nrow = niter, ncol = length(var.names)-1)

for (i in 1:niter){
  ### SRS Sampling
  no.srs<-sample(1:dim(newXweight)[1], nclust)
  out.srs<-newXweight[no.srs,var.names]

```

```

sim.srs[i,]<-as.numeric(lapply(X = out.srs[,c(1:18)], 2,FUN
=weighted.mean,w=out.srs[,c(19)]))

# Sampling based-on MB-cluster
out.clust<-matrix(NA, nrow = nclust, ncol = length(var.names))
for (j in 1:nclust){
  dt.cl<-newXweight[which(newXweight$cl.MB==j),var.names]
  s<-sample(1:dim(dt.cl)[1],1)
  out.clust[j,]<-as.numeric(dt.cl[s,])
}
sim.clust[i,]<-as.numeric(lapply(X =
data.frame(out.clust[,c(1:18)]), 2,FUN
=weighted.mean,w=out.clust[,c(19)]))
}
sd.srs<-sd.clust<-eff<-c()
for (j in 1:(length(var.names)-1))
{
  sd.srs[j]<-sd(sim.srs[,j])
  sd.clust[j]<-sd(sim.clust[,j])
  eff[j]<-var(sim.srs[,j])/var(sim.clust[,j])
}
(cbind(var.names[-19], round(sd.srs, digits=3), round(sd.clust,
digits=3), round(eff, digits = 1)))[c(5,11,12,14, 18,16, 17),]
(cbind(var.names[-19], round(sd.srs, digits=3), round(sd.clust,
digits=3), round(eff, digits = 1)))

# Clusters according to Provinces
-----
ProvinceClusters <-
matrix(0,length(levels(factor(IQCAMP.data$province))),3)
for(i in 1:length(levels(factor(IQCAMP.data$province))))
{
  IthProvince <- subset(IQCAMP.data,province == i-1 )
  IthProvince.mb <- IthProvince$cl.MB
  NUMBER.mb <- order(as.matrix(table(IthProvince.mb)),decreasing =
TRUE)[1]
  ProvinceClusters[i,3] <-
strtoi(rownames(as.matrix(table(IthProvince.mb)))[NUMBER.mb])
  ProvinceClusters[i,1] <- IthProvince$province[1]
  ProvinceClusters[i,2] <- as.character(IthProvince$PROVINCE[1])
}
colnames(ProvinceClusters)<-c("PROVINCEID","PROVINCE", "cluster.mb" )
ProvinceClusters <- data.frame(ProvinceClusters)
#View(ProvinceClusters)
IQCAMP.data$cl.MB <- as.factor(IQCAMP.data$cl.MB)

# Province Distance Weighted
-----
merge.data <- merge(IQCAMP.data,

```

```

w.data ,by=c("district","province"))
table(is.na(merge.data$pop))
ProvinceDistanceMatrix <- matrix(0,31,31)
for(i in 0:29)
  for(j in i+1:29)
    if(j <= 30 & i!=25 & j!=25)
    {
      s1 <- subset(merge.data, province == i)
      s1 <- as.matrix(s1[,c((5:22),26)])
      sma1 <- apply(s1[,1:18], 2, FUN=weighted.mean,weights=s1[,
19])

      s2 <- subset(merge.data, province == j)
      s2 <- as.matrix(s2[,c((5:22),26)])
      sma2 <- apply(s2[,1:18], 2,FUN=weighted.mean, weights=s2[,
19])

      dis = (sma1-sma2)
      dis = dis^2
      ProvinceDistanceMatrix[i+1,j+1] <- sum(dis)
    }
#####
for (i in 25:25) ###Qom weight is 1
  for (j in i+1:29)
    if(j <= 30)
    {
      s1 <- subset(merge.data, province == i)
      s1 <- as.matrix(s1[,c(5:22)])
      sma1 <- apply(s1 , 2 , sum)
      s2 <- subset(merge.data, province == j)
      s2 <- as.matrix(s2[,c((5:22),26)])
      sma2 <- apply(s2[,1:18], 2,FUN=weighted.mean,weights=s2[,
19])

      dis = (sma1-sma2)
      dis = dis^2
      ProvinceDistanceMatrix[i+1,j+1] <- sum(dis)
    }

for (i in 0:24 ) ###Qom weight is 1
  for (j in 25:25)
  {
    s1 <- subset(merge.data, province == i)
    s1 <- as.matrix(s1[,c((5:22),26)])
    sm1 <- apply(s1[,1:18], 2,FUN=weighted.mean , weights=s1[,19])
    s2 <- subset(merge.data, province == j)
    s2 <- as.matrix(s2[,c(5:22)])
    sma2 <- apply(s2 , 2 , sum)
    dis = (sma1-sma2)
    dis = dis^2
    ProvinceDistanceMatrix[i+1,j+1] <- sum(dis)
  }

```

```

### Select Provinces from MCM Clusters
###Based on 8 cluster
dis.data<-ProvinceDistanceMatrix
select.pro <- rep(NA,8)
for (c in 1:8)
{
  pro.clust <-
sort(unique(IQCAMP.data$province[IQCAMP.data$cl.MB==c ]))
  pro.clust <- pro.clust+1
  nrow(dis.data)
  ncol(dis.data)
  x <- matrix(0 ,length(pro.clust) , length(pro.clust) )
  colnames(x) <- pro.clust
  rownames(x) <- pro.clust
  for (i in 1 : length(pro.clust))
    for (j in 1 : length(pro.clust))
      #if (j <= length(pro.clust))
      {
        {
          x[ i , j] = dis.data[(pro.clust[i]),(pro.clust[j])]
        }
      }
  lowerTriangle(x,diag=F, byrow=T) = upperTriangle(x,diag=F)
  #diag(x) = NA
  mean.pro <- apply(x , 2 , mean , na.rm=T)

  select.pro[c] <- names(which.min(mean.pro)) #####based on 1 to
31 province codes
}

#####final result
#####based on 1 to 31 province codes
select.pro

# Plots at Provincial levels
-----
data.shape31 = attr(shape31, "data")
districtname<-c("MK","GI","MN","EA","WA","BK","KZ","FA",
               "KE","KR","ES","SB","KD","HD","CM","LO","IL",
               "KB","BS","ZA","SM","YA","HG","TE","AR","QM",
               "QZ","GO","KN","KS","AL")
order <- match(data.shape31$SP_ID, ProvinceClusters$PROVINCEID )
order
ProvinceClusters<-ProvinceClusters[order,]
ProvinceClusters$District<-districtname
rownames(ProvinceClusters)<-ProvinceClusters$PROVINCEID
xx.profile <- spCbind(shape31,ProvinceClusters)
data.shape31 = attr(xx.profile, "data")

### Model based clustering

```

```

col <- rev(brewer.pal(8,"Spectral"))
regionnames <- c("Cluster1", "Cluster2", "Cluster3", "Cluster4",
                 "Cluster5", "Cluster6", "Cluster7", "Cluster8")

# Create list object for sp.layout
sp.label <- function(x, label) {list("sp.text", coordinates(x),
label)}
NUMB.sp.label <- function(x) {sp.label(x,
as.vector(x@data$District))}
make.NUMB.sp.label <- function(x) {do.call("list",
NUMB.sp.label(x))}

# Spplot
# tps <- list(fontsize=list(text=5), fontcolor=list(text="green"))
# trellis.par.set(tps)

pdf(paste0("Province-level results_Model based clustering
method.pdf"), height=8, width=8)
par(mfrow=c(1,1), mar=c(4,4,4,4))
spplot(xx.profile, "cluster.mb", col.regions =col,
col="gray30",cex.main=3,
      main=paste("Clustering of Prior Information",
                 "using Model-based Method (MCM)",sep="\n"),
      colorkey = list(labels = list( labels =regionnames),width
= 1, cex = 5),
      sp.layout = make.NUMB.sp.label(xx.profile), cex.main=1.5)
dev.off()

# Plots at District levels
-----
data.shape397 = attr(shape397, "data")
order <- match(data.shape397$SP_ID,IQCAMP.data$district)
order
IQCAMP.data<-IQCAMP.data[order,]
rownames(IQCAMP.data)<-IQCAMP.data$district
xx.profile <- spCbind(shape397,IQCAMP.data)
table(xx.profile$cl.MB)

### Model based clustering
pdf(paste0("District-level results_Model based clustering
method.pdf"), height=6, width=8)
par(mfrow=c(1,1), mar=c(4,4,4,4))
col <- rev(brewer.pal(8,"Spectral"))
regionnames <- c("Cluster1: 31 districts", "Cluster2: 86
districts", "Cluster3: 49 districts", "Cluster4: 59 districts",
                 "Cluster5: 40 districts", "Cluster6: 42
districts", "Cluster7: 45 districts", "Cluster8: 61 districts")

spplot(xx.profile, "cl.MB", col.regions =col, col="gray30",
      cex.main=3, main=paste("Clustering of Prior Information at

```



```
District Level",  
                                "using Model-based Method  
(MCM)",sep="\n"),  
                                colorkey = list(labels = list( labels =regionnames),width =  
2, cex = 5))  
                                dev.off()
```
